# Supplementary material
Source: publisher figshare collection journal article supplement (https://frontiersin.figshare.com/ndownloader/files/25890837)

**Supplementary Figure S1A-B:** Average latency [s] to find the food reward during CB training **(A)** and reversal CB training **(B)** with *day-by-day* analysis of successful learning for each experimental group. Data for wild type-like (WT) control and double transgenic *APP<sup>Swe</sup>/PS1<sup>ΔE9</sup>* (*APPxPS1*) female mice treated with either vehicle (VEH) or cannabidiol (CBD) are shown as means  $\pm$  SEM. Significant one-way RM ANOVA for ‘time’ for day 1 *versus* respective day on which successful learning was evident indicated by a bracket labelled with the experimental group with respective significance value indicated by ‘^’ ( $p < .05$ ,  $^{\wedge}p < .01$ , and  $^{\wedge\wedge}p < .001$ ).

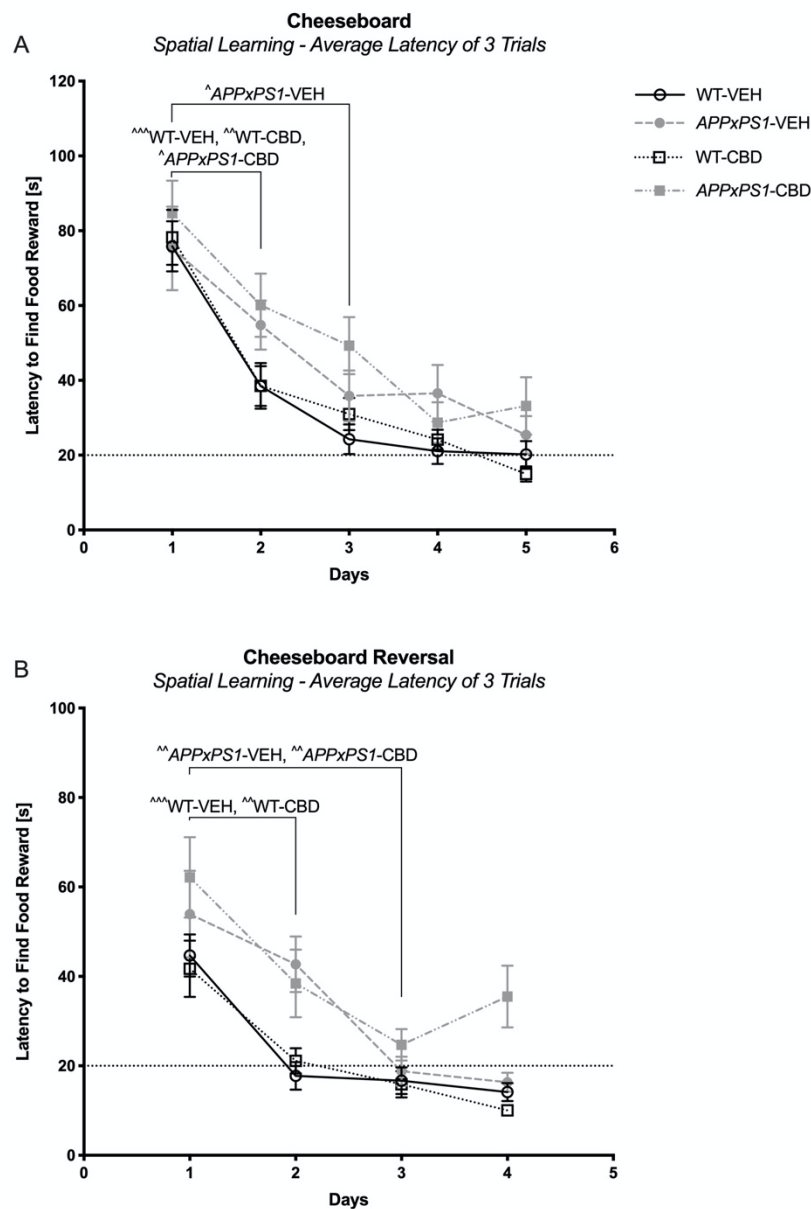

**Supplementary Figure S2A-B:** Mean speed [m/s] in the cheeseboard averaged across all three trials for **(A)** initial training and **(B)** reversal training. Data for non-transgenic wild type-like (WT) control and double transgenic *APP<sub>Swe</sub>/PS1 $\Delta$ E9* (*APPxPS1*) female mice treated with either vehicle (VEH) or cannabidiol (CBD) are shown as means  $\pm$  SEM. Significant ‘genotype’ main effects are indicated by ‘\*’ (\*\**p* < .001). A significant ‘time’ by ‘genotype’ by ‘treatment’ interaction was evident during reversal training (*p* < .001).

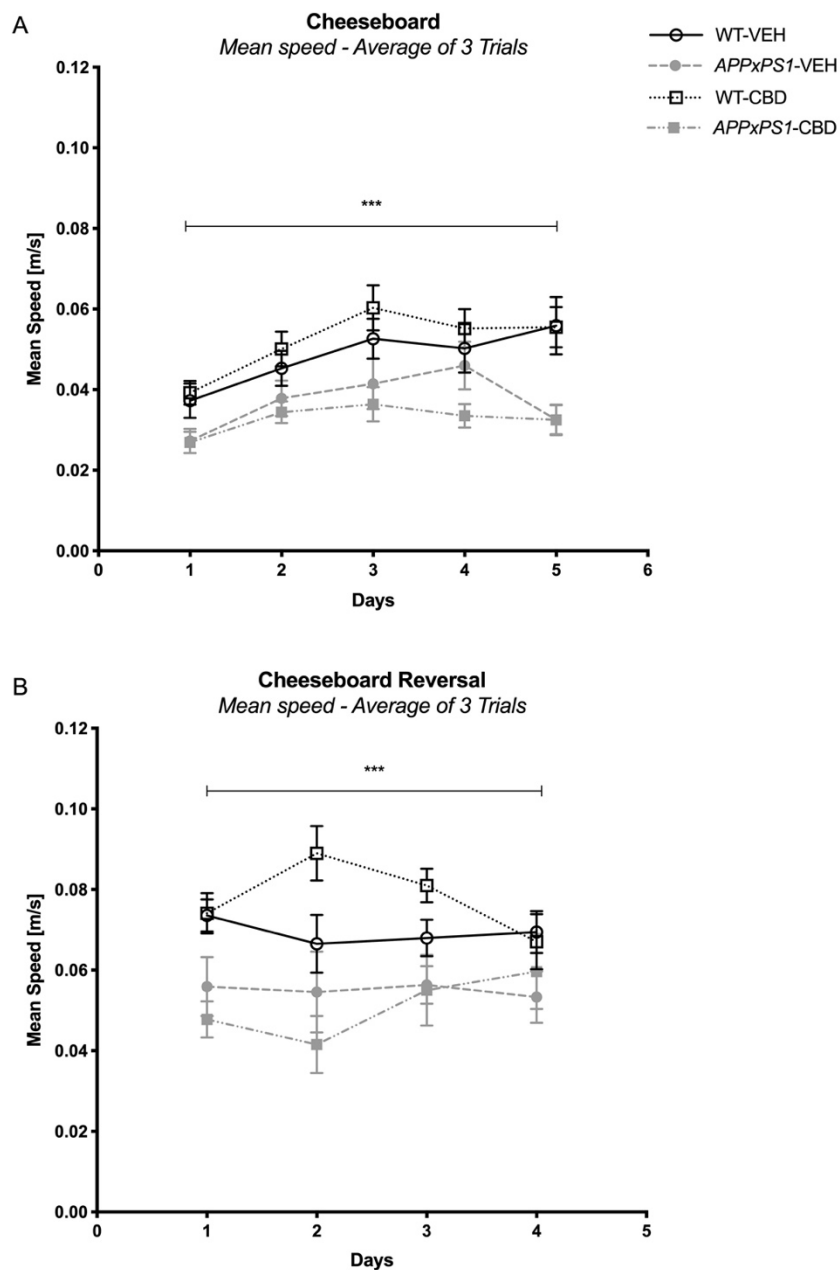

**Supplementary Figure S3A-B:** Percentage of time spent [%] in the target zone excluding latency to leave the centre zone for **(A)** the CB probe trial and **(B)** the reversal CB probe trial. Data for wild type-like (WT) control and double transgenic *APP<sub>Swe</sub>/PS1 $\Delta$ E9* (*APPxPS1*) female mice treated with either vehicle (VEH) or cannabidiol (CBD) are shown as means + SEM. Significant t-test results against chance levels (i.e. 12.5%) are indicated by ‘+’ ( $^+p < .05$ ,  $^{++}p < .01$  and  $^{+++}p < .001$ ).

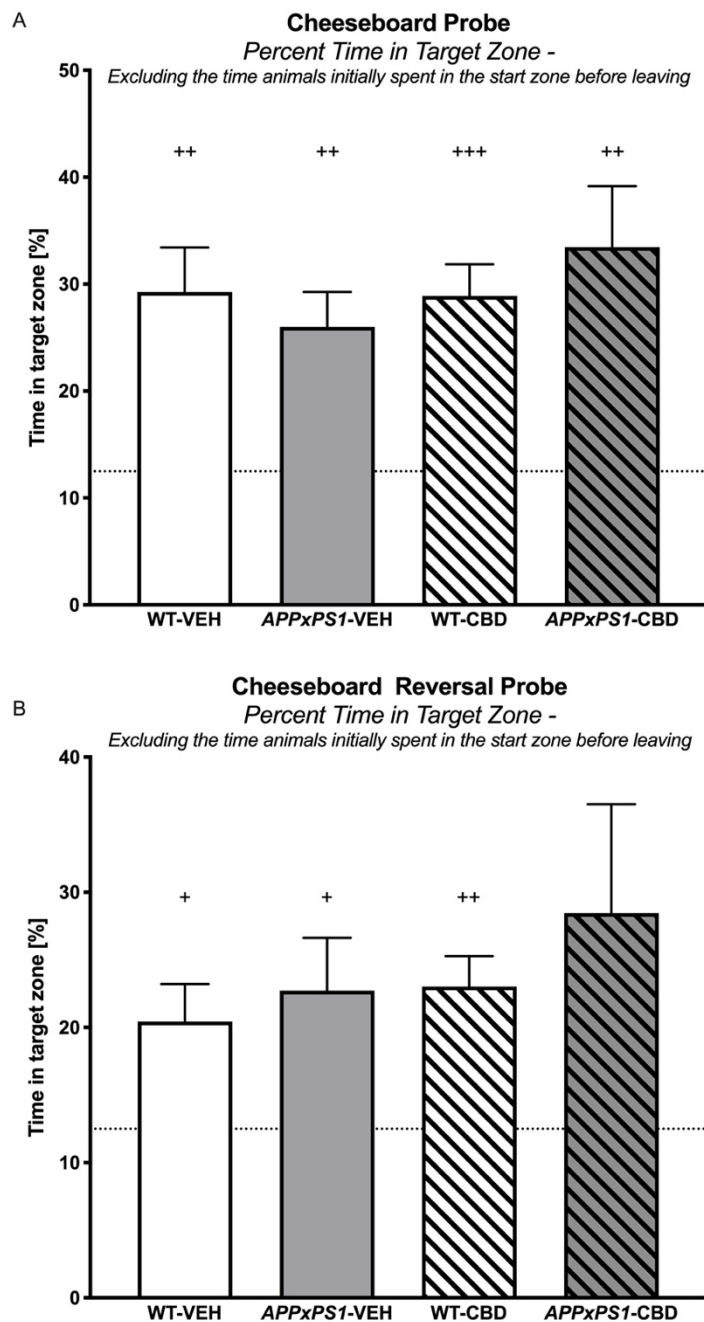

**Supplementary Figure S4:** Acoustic startle response (ASR) across the first five, middle five and last five blocks of 120dB startle pulses during the prepulse inhibition protocol, i.e. startle habituation. Data for non-transgenic wild type-like (WT) control and double transgenic *APP<sub>Swe</sub>/PS1 $\Delta$ E9* (*APPxPS1*) female mice treated with either vehicle (VEH) or cannabidiol (CBD) are shown as means  $\pm$  SEM. A significant RM effect of ‘time’ is indicated by ‘^’ ( $^{^^}p < .001$ ).

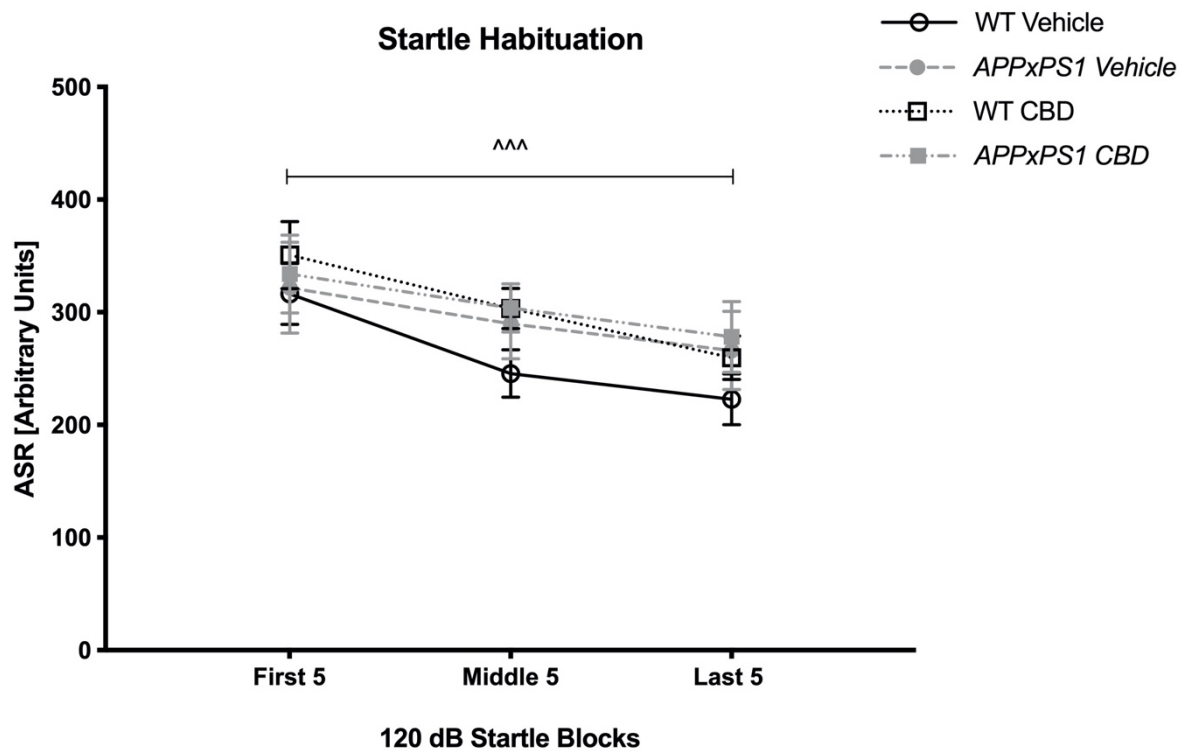

Supplement: Supplementary file [file 25890837]
